# Supplementary material for: Inter- and Intra-observer Reliability of the “assessment of Motor Repertoire- 3 to 5 Months” Based on Video Recordings of Infants With PWS
Source: Research Square preprint supplement (doi:10.21203/rs.3.rs-1047396/v1), 2021-11-16
Supplement: Supplementary file 1 [file 39384341220bf967ca1179fb.docx]

**Supplementary materials: Medical history of fifteen neonates with Prader-Willi syndrome**

| Subjects | Gender | GA, weeks | GMs, weeks | Birthweight, g | Genetic Diagnosis, week |
| --- | --- | --- | --- | --- | --- |
| No.1 | Man | 33 | 10 | 2750 | 6 |
| No.2 | Man | 36 | 10 | 2900 | 65 |
| No.3 | Female | 36 | 11 | 3050 | 19 |
| No.4 | Man | 40 | 9 | 2600 | 3 |
| No.5 | Man | 38 | 9 | 2580 | 12 |
| No.6 | Man | 38 | 10 | 2200 | 17 |
| No.7 | Female | 39 | 10 | 1802 | 9 |
| No.8 | Man | 38 | 12 | 2600 | 10 |
| No.9 | Man | 39 | 13 | 2700 | 19 |
| No.10 | Man | 39 | 14 | 2450 | 20 |
| No.11 | Man | 40 | 15 | 2600 | 12 |
| No.12 | Female | 38 | 16 | 2750 | 26 |
| No.13 | Man | 39 | 17 | 2500 | 7 |
| No.14 | Man | 39 | 17 | 2600 | 10 |
| No.15 | Man | 38 | 18 | 3250 | 40 |

GA, Gestational Age; GMs, General Movement;
